# Supplementary material for: Potential TSPO Ligand and Photooxidation Quencher Isorenieratene from Arctic Ocean Rhodococcus sp. B7740
Source: PubMed Central journal article supplement (PMC6627809; doi:10.3390/md17060316), 2019-05-29
Supplement: marinedrugs-17-00316-s001.pdf [file marinedrugs-17-00316-s001.pdf]

**Figure S1**

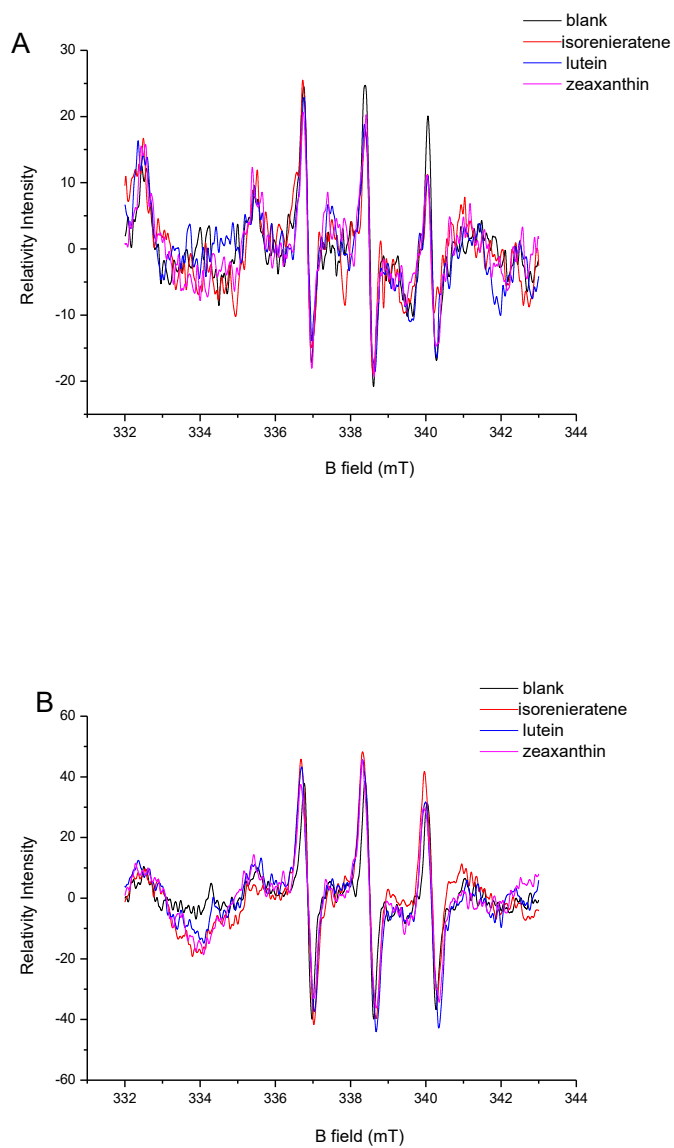

**Figure S1.** The singlet oxygen accumulations in model liposomes after 30 (A), 90 (B) mJ/cm<sup>2</sup> of UVB irradiation with or without pretreatments of carotenoids, respectively.

Figure S2

A

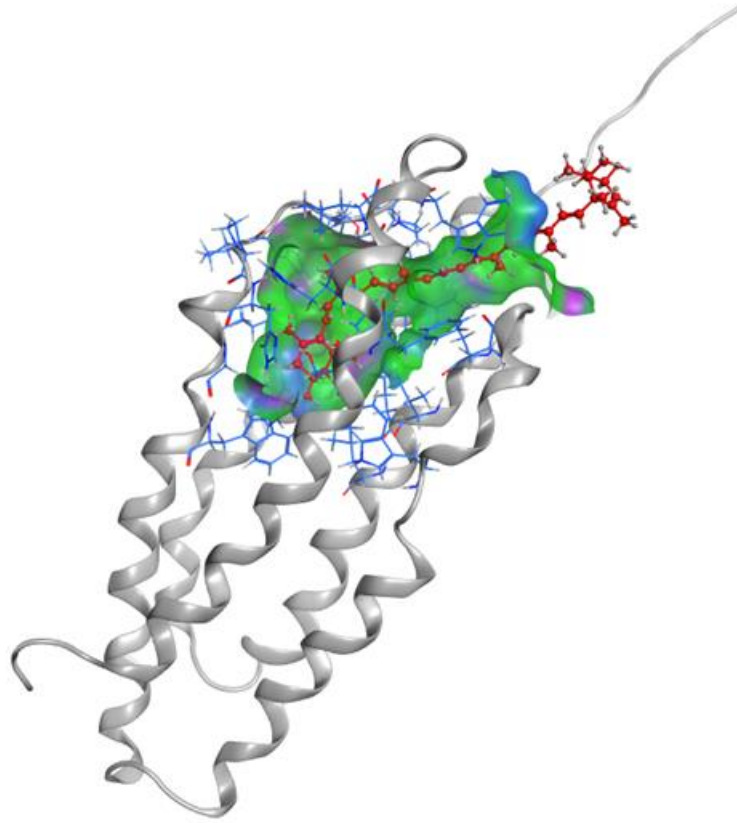

B

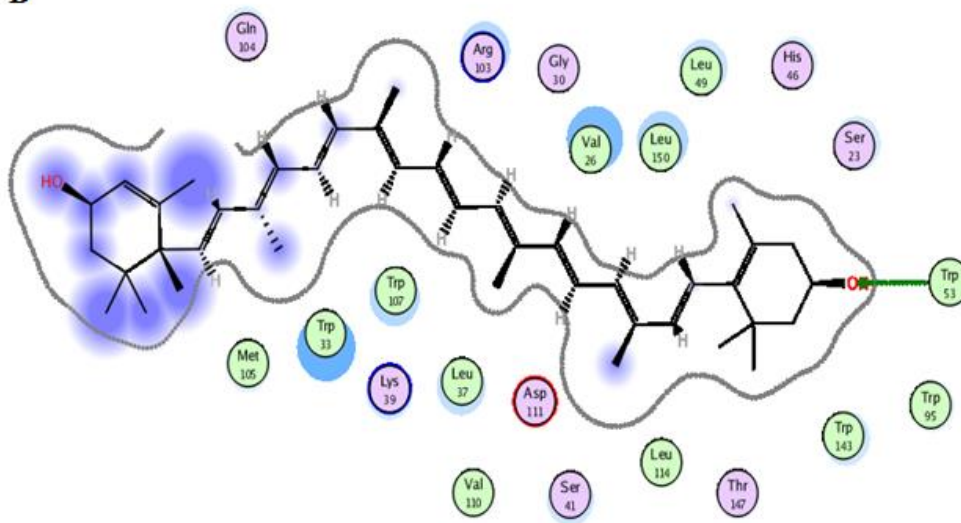

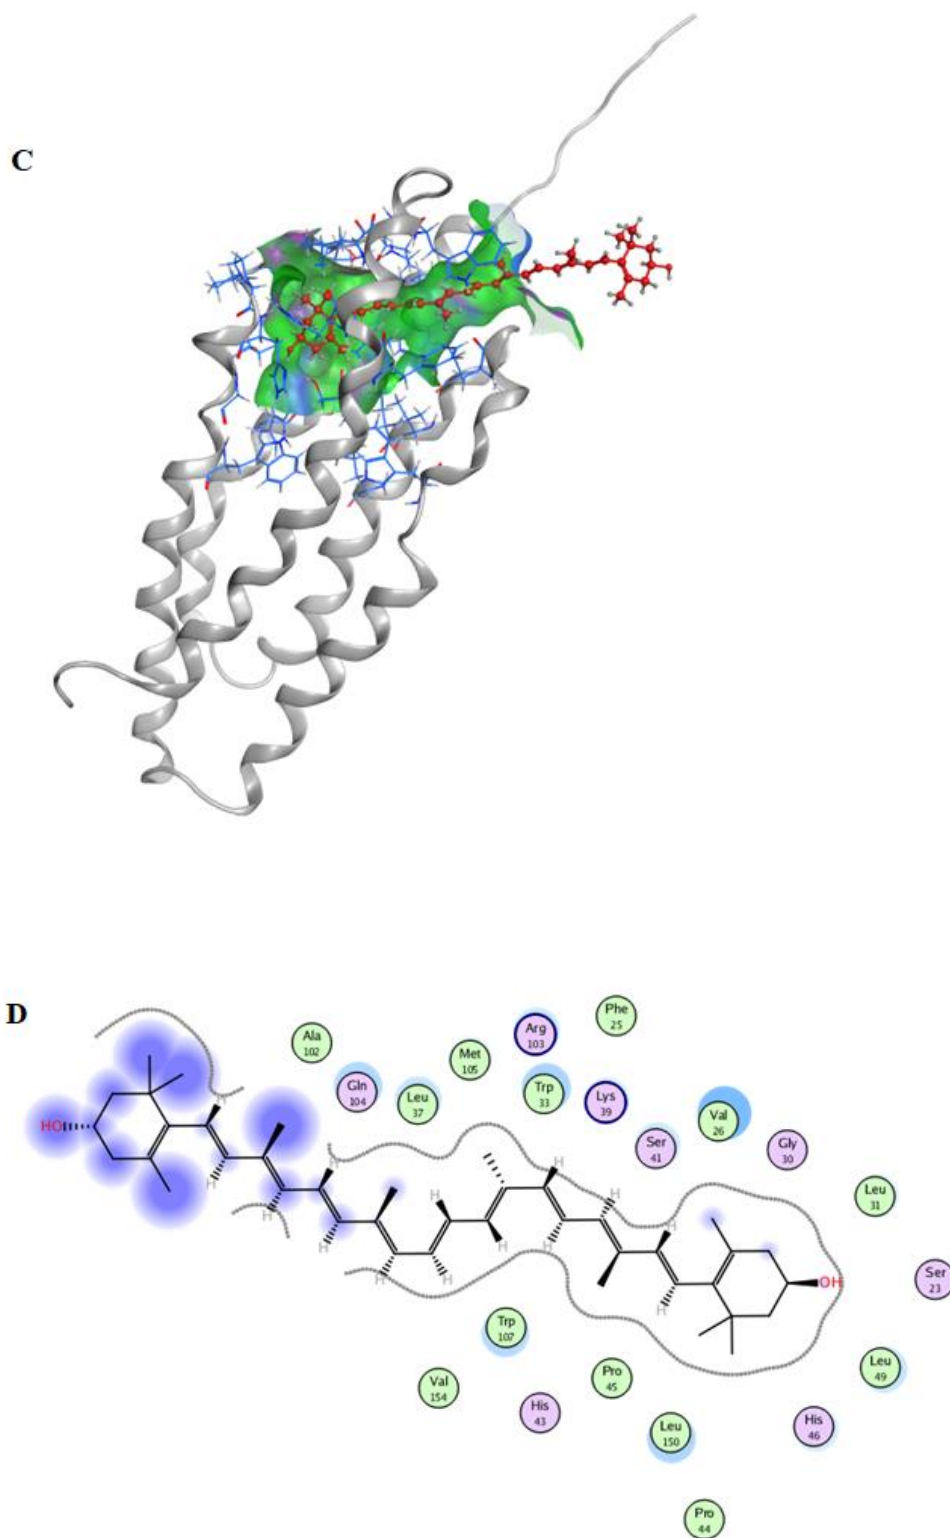

**Figure S2.** Interaction of lutein(A) and zeaxanthin(C) binding to hTSPO; Molecular contacts between lutein(B) or zeaxanthin(D) and amino acids of hTSPO.
